1 **Title: Double burden of malnutrition and its social disparities among rural Sri Lankan**  
2 **adolescents**

**Short Title: Malnutrition in rural Sri Lankan adolescents**

3

4 B. L. Goonapienuwala<sup>1¶</sup>, N. S. Kalupahana<sup>2¶</sup>, S. B. Agampodi<sup>3, #a ¶§\*</sup>, S. Siribaddana<sup>4¶§</sup>

5

6 <sup>1</sup>Department of Physiology, Faculty of Medicine and Allied Sciences, Rajarata University of  
7 Sri Lanka, Saliyapura, Sri Lanka.

8 <sup>2</sup>Department of Physiology, Faculty of Medicine, University of Peradeniya, Peradeniya, Sri  
9 Lanka.

10 <sup>3</sup>Department of Community Medicine, Faculty of Medicine and Allied Sciences, Rajarata  
11 University of Sri Lanka, Saliyapura, Sri Lanka.

12 <sup>4</sup>Department of Medicine, Faculty of Medicine and Allied Sciences, Rajarata University of  
13 Sri Lanka, Saliyapura, Sri Lanka.

14 <sup>#a</sup> Current address: School of Medicine, Yale University, New Haven, Connecticut, United  
15 States of America

16

17 \* Corresponding author

18 Email: [suneth.agampodi@yale.edu](mailto:suneth.agampodi@yale.edu) , [sunethagampodi@yahoo.com](mailto:sunethagampodi@yahoo.com) (SBA)

19

20 ¶ These authors contributed equally to this work

21 § Equal senior authors

22

23

24

**NOTE: This preprint reports new research that has not been certified by peer review and should not be used to guide clinical practice.**

## 25 **Abstract**

26 In Sri Lanka, the double burden of nutrition is often neglected, and increase of adolescent  
27 obesity is not well investigated. This study determines the double burden of malnutrition  
28 among adolescents in Anuradhapura district exploring the differences of prevalence based on  
29 different definitions. Students aged 13 to 16 years were selected from 74 schools using  
30 probability proportionate to size sampling. Anthropometry was done according to WHO  
31 guidelines. Obesity was defined according to body mass index (BMI) based definitions of  
32 WHO, International Obesity Task Force and Indian growth references. Central obesity was  
33 defined using Indian and British waist circumference cut-offs. Prevalence estimates from  
34 different definitions were compared using McNemar's test. Socio-demographic determinants  
35 of nutritional issues were assessed using Chi-square test for independence. A total of 3105  
36 students (47.7% boys) were studied (mean age  $14.8 \pm 0.8$  years). According to WHO  
37 definitions, 73 (2.4%, 95% CI; 1.9–2.9) were obese, 222 (7.2%, 95% CI; 6.3–8.1) were  
38 overweight, 673 (21.7%, 95% CI; 20.2–23.1,) were thin and 396 (12.8%, 95% CI; 11.6–14.0)  
39 were stunted. More boys (3.1%) than girls (1.7%) were obese as well as thin (29.0%  
40 compared to 15.0%). Prevalence of overweight/obesity was higher among students in larger,  
41 urban schools, and belonging to high social class and more educated parents. Prevalence of  
42 overweight/obesity estimated using IOTF-Asian and Indian thresholds were significantly  
43 higher than that from WHO and IOTF-international thresholds. Double burden of  
44 malnutrition is affecting the adolescents in rural Sri Lanka. Prevalence estimates of obesity  
45 largely depend on the definition used.

## 46 **Introduction**

47 The mean age adjusted body mass index (BMI) for children and adolescents has risen from  
48 17.2 to 18.6 among girls and 16.8 to 18.5 among boys from 1975 to 2016 [1]. As a result, the

49 prevalence of overweight and obesity has increased from 8.1% to 12.9% among boys and  
50 8.4% to 13.4% among girls in low and middle-income countries. The respective prevalence  
51 in high-income countries was 23.8% and 22.6% [2]. This increase has a direct contribution  
52 to more than 17 million deaths due to cardiovascular diseases [3] as well as global morbidity  
53 and mortality due to many other non-communicable diseases worldwide.

54 Adolescents make up about 18% of the world population and more than half of those live in  
55 Asia [4]. Since adolescents are typically considered a “healthy” group, less attention has  
56 been paid on adolescent health. The adolescent health programs are traditionally focusing on  
57 reproductive and sexual health issues. In regions such as South and Central Asia, where the  
58 under-nutrition rates are still high, the double burden of nutrition is often neglected, and the  
59 increase of childhood and adolescent obesity is not well addressed. Even in places where  
60 studies are carried out, the focus is on urban adolescents. Further, the measurement diversity  
61 as proposed by different international agencies (WHO, NHANES III, IOTF, CDC) makes the  
62 comparison difficult.

63 Obesity and overweight can be assessed using several measures; e.g., body mass index  
64 (BMI), waist circumference (WC), waist to hip ratio, waist to height ratio (WHtR) and skin  
65 fold thickness. BMI is considered the best and most widely used anthropometric index in  
66 population studies but sensitivity to detect obesity is questioned [5,6]. Although there is a  
67 good correlation between BMI and body fat, there is evidence for ethnic differences in body  
68 fat content. Asians have higher body fat percentage compared to Caucasians for a given BMI  
69 [7]. These led to development of country specific thresholds in many countries including  
70 USA, UK and India.

71 In Sri Lanka, research on adolescent nutrition was mainly conducted in urban areas.  
72 Prevalence of overweight and obesity in Colombo was between 1.9% and 13% among  
73 schooling adolescents [6,8–11]. The wide variation in estimates is due to different definitions

74 used as well as selection biases in some studies. Due to the higher genetic risk for  
75 cardiovascular diseases, local thresholds for BMI and WC [12] for Sri Lankan children have  
76 been proposed recently. However, due to lack of consensus, international definitions are still  
77 being used in most studies. The present study aimed to determine the prevalence of obesity  
78 and the existence of double burden of malnutrition in rural Sri Lanka, eliminating the  
79 sampling biases to provide better estimates as well as to explore the discrepancies with  
80 different definitions to detect obesity.

81

82

83

84

85

86

87

88

89

90

91

92

93

94

95

96

97

98

## 99 **Materials and Methods**

### 100 **Design, setting and population**

101 This school based cross sectional descriptive study was carried out in Sinhala medium  
102 schools in Anuradhapura district, Sri Lanka, from April 2013 to November 2014. In the  
103 district, 94% of the population was rural and 90.9% were Sinhalese [13]. There were 546  
104 schools in the district and 481 of them were Sinhala medium. Of this, 322 schools had  
105 classes up to grade 11 or above [14]. There were total of 45,391 students with 12,175 in  
106 grade 9, 12,150 in grade 10 and 21,066 in grade 11.

### 107 **Study sample and sampling technique**

108 The sample size was calculated to detect 5% prevalence of overweight and obesity with 0.2  
109 precision with 95% confidence interval. Sample size was adjusted for design effect of 1.5  
110 because of cluster sampling. Total calculated sample size was 3036. The cluster size was the  
111 most frequent number of students (33 students) per class and there were 92 clusters  
112 (3036/33). Cluster selection was done using probability proportionate to size sampling and  
113 the 92 clusters were finally drawn from 74 schools.

### 114 **Study instruments and measurements**

115 Anthropometric measurements were carried out according to WHO guidelines [15]. Height  
116 was measured to the nearest millimeter using portable stadiometers (Seca 213 – Germany);  
117 standing without footwear, with heel, back and occiput touching the measuring board and  
118 eyes at the same level as ears (Frankfurt plane). Weight was measured to the nearest 100g  
119 with student wearing the uniform and without footwear, using portable digital weighing  
120 scales (Seca 803 – Germany). WC was measured to the nearest millimeter using a flexible  
121 tape at the midpoint between the lowest rib and the superior iliac spine during expiration  
122 [15]. Six pre-registration medical graduates were trained on anthropometric measurements

123 and data collection. Observer and instrument error for the measurements were assessed on  
124 nine students with the six observers trained on anthropometric measurements using two  
125 instruments for each measurement. Separate height and weight measuring scales were used  
126 for girls and boys and the same scales were used throughout the study. The two waist  
127 measuring tapes were regularly compared with a standard tape for discrepancies in  
128 calibration. When the discrepancy was found to be more than 1 mm, that tape was replaced  
129 with a new one.

130 Waist circumference was measured over the school uniform and without the uniform as a  
131 preliminary study and correction factors were applied for WC measurements taken over the  
132 uniform. Each school was visited twice. During the first visit, classes were selected and  
133 consent forms for parents and information leaflets were distributed. Second visit was to  
134 collect data. Students completed the self-administered questionnaire on socio-demographic  
135 data. Each anthropometric measurement was repeated thrice, and the mean value was taken.

## 136 **Analysis of data**

137 Age and sex segregated descriptive statistics were carried out for height, weight, WC, BMI,  
138 WHtR, z-scores of BMI for age and height for age. Z-Scores for BMI and height were  
139 calculated using WHO Anthro-plus software [16]. Thinness (BMI for age less than 2SD),  
140 severe thinness (BMI for age less than 3SD), stunting (height for age less than 2SD) and  
141 severe stunting (height for age less than 3SD) were defined according to WHO 2007 growth  
142 references [17]. Hereafter, unless specified, “thinness” also includes those with severe  
143 thinness, and “stunting” includes those with severe stunting.

144 We used following definitions of obesity in our study.

145 1. WHO child growth references [17]

146 Based on BMI z-score for age; overweight > 1SD but equals or less than 2SD and  
147 obese > 2SD. This is for children and adolescents aged 5 to 19 years. Overweight  
148 category does not include individuals with obesity.

149 2. International Obesity Task Force (IOTF) [18]

150 BMI thresholds for overweight and obesity for each month from two to 18 years of  
151 age are available in the IOTF database. We used both Asian and international BMI  
152 thresholds.

153 3. Proposed Indian BMI thresholds [19]

154 Indian Academy of Pediatrics has given age and sex specific BMI thresholds for  
155 overweight and obesity for every six months from five to 18 years.

156 Visceral obesity was again estimated using different indices;

157 1. 70<sup>th</sup> percentile of WC for Indian children [20]

158 A study involving five major cities covering India has defined the 70<sup>th</sup> percentile of  
159 WC as the threshold for diagnosing metabolic syndrome in Indian children.

160 However, this study measured the WC in accordance with the NHANES methodology  
161 (above upper lateral border of the right ilium). A prediction equation was used to  
162 convert the WC according to WHO anthropometric guidelines [21].

163 2. 90<sup>th</sup> percentile of WC for British children [22]

164 International Diabetes Federation recommended the 90<sup>th</sup> percentile of WC to define  
165 central obesity as one of the diagnostic criteria of metabolic syndrome in children  
166 [23].

167 3. 75<sup>th</sup> percentile of WC for south Indian children [24]

168 A South Indian study has suggested the use of 75<sup>th</sup> percentile from their study as an  
169 action point in identifying obesity in Indian children.

170 For the purpose of analysis, parental education level was divided into two categories  
171 (educated up to grade 11, and above GCE (O/L) exam level). Social class was determined on  
172 the highest-ranking occupation of the parents.

173 Data were analyzed using IBM SPSS 20<sup>th</sup> version.

## 174 **Ethical concerns**

175 Ethical approval of the study was obtained from the Ethics review committee of the faculty of  
176 Medicine and Allied Sciences, Rajarata University of Sri Lanka. Permission was obtained  
177 from the provincial and zonal education departments and principals of the selected schools.  
178 Informed written consent was taken from the parents and students for participation in the  
179 study as well as possible publication of the results. Anonymity was maintained throughout  
180 data handling process. A health education program was organized for those who were  
181 detected as overweight and obese. They were referred for further medical management  
182 depending on the results of screening tests for metabolic derangements.

## 183 **Results**

184 A total of 3135 students were recruited and age specific growth parameters were available for  
185 3105 (99.0%) students. Of this 3105, 1481 (47.7%) were boys and 3094 (99.6%) were  
186 Sinhalese. Mean age (SD) of the sample was 14.8 (0.8) years (range = 13.0 to 16.9). Table 1  
187 shows the characteristics of the study sample.

188 **Table 1: Socio-demographic characteristics of the 3105 adolescents from rural Sri**  
189 **Lanka included in the study sample**

|                    | <b>Boys</b>     | <b>Girls</b>   |
|--------------------|-----------------|----------------|
| Number of students | 1481 (47.7)     | 1624 (52.3)    |
| Mean age (years)   | 14.8 (SD = 0.8) | 14.8 (SD =0.8) |
| Ethnicity          |                 |                |
| Sinhala            | 1471 (99.3)     | 1623 (99.9)    |
| Tamil              | 0 (0.0)         | 0 (0.0)        |
| Moor/Malay         | 9 (0.6)         | 1 (0.1)        |
| Other              | 1 (0.1)         | 0 (0.0)        |

|                          |             |             |
|--------------------------|-------------|-------------|
| Grade in school          |             |             |
| 9                        | 496 (33.7)  | 515 (31.8)  |
| 10                       | 712 (48.4)  | 830 (51.2)  |
| 11                       | 262 (17.8)  | 276 (17.0)  |
| Education zone           |             |             |
| Anuradhapura             | 541 (36.5)  | 532 (32.8)  |
| Kekirawa                 | 236 (15.9)  | 270 (16.6)  |
| Tambuththegama           | 307 (20.7)  | 353 (21.7)  |
| Galenbindunuwewa         | 182 (12.3)  | 225 (13.9)  |
| Kebithigollewa           | 215 (14.5)  | 244 (15.0)  |
| School type              |             |             |
| 1AB                      | 568 (38.4)  | 586 (36.1)  |
| 1C                       | 580 (39.2)  | 635 (39.1)  |
| Type 2                   | 333 (22.5)  | 403 (24.8)  |
| Mother's education level |             |             |
| Up to grade 11           | 740 (66.8)  | 862 (65.3)  |
| O/L and above            | 368 (33.2)  | 458 (34.7)  |
| Father's education level |             |             |
| Up to grade 11           | 697 (67.0)  | 762 (64.7)  |
| O/L and above            | 344 (33.0)  | 415 (35.3)  |
| Employed mothers         | 518 (35.3)  | 567 (35.3)  |
| Employed fathers         | 1351 (92.9) | 1463 (92.7) |
| Social class             |             |             |
| High                     | 100 (7.3)   | 98 (6.4)    |
| Middle                   | 1160 (84.1) | 1265 (82.1) |
| Low                      | 119 (8.6)   | 178 (11.6)  |

190 Number of boys and girls in each category is given along with percentage within parenthesis.

191 **Distribution of anthropometric measurements and nutritional status**

192 Table 2 shows age and sex segregated distribution of anthropometry, BMI-for-age and height-for-age Z scores. Distribution of severe thinness,  
 193 thinness, overweight, obesity, severe stunting and stunting in the study sample are also shown.

194 **Table 2: Age and sex segregated distribution of growth parameters among schooling adolescents in the Anuradhapura district, Sri**  
 195 **Lanka**

|                                                                                         | 13 Years <sup>a</sup>    |                   | 14 Years                 |                  | 15 Years                 |                  | 16 Years                 |                  |
|-----------------------------------------------------------------------------------------|--------------------------|-------------------|--------------------------|------------------|--------------------------|------------------|--------------------------|------------------|
|                                                                                         | Boys<br>(n= 186)         | Girls<br>(n =225) | Boys<br>(n=574)          | Girls<br>(n=639) | Boys<br>(n=578)          | Girls<br>(n=608) | Boys<br>(n=143)          | Girls<br>(n=152) |
| <b>Mean (SD) of growth parameters</b>                                                   |                          |                   |                          |                  |                          |                  |                          |                  |
| Height (cm)                                                                             | 153.5 (7.6) <sup>b</sup> | 151.4 (6.0)       | 158.4 (8.1) <sup>b</sup> | 153.3 (5.5)      | 162.6 (7.4) <sup>b</sup> | 154.6 (5.4)      | 164.4 (5.8) <sup>b</sup> | 153.8 (5.4)      |
| Weight (kg)                                                                             | 41.7 (11.6)              | 40.6 (8.1)        | 44.4 (11.0)              | 43.8 (8.5)       | 48.6 (10.8) <sup>b</sup> | 45.1 (8.2)       | 50.9(10.4) <sup>b</sup>  | 45.7 (7.8)       |
| Waist circumference (cm)                                                                | 62.3 (9.0) <sup>b</sup>  | 60.2 (6.8)        | 63.2 (9.0)               | 62.3 (7.2)       | 65.4 (8.8) <sup>b</sup>  | 63.0 (7.0)       | 66.4 (8.6) <sup>b</sup>  | 63.7 (7.2)       |
| BMI (kg/m <sup>2</sup> )                                                                | 17.5 (3.7)               | 17.7 (3.0)        | 17.5 (3.4) <sup>b</sup>  | 18.6 (3.2)       | 18.3 (3.4) <sup>b</sup>  | 18.8 (3.1)       | 18.8 (3.1)               | 19.3 (3.3)       |
| Waist to height ratio                                                                   | 0.41 (0.1)               | 0.40 (0.0)        | 0.40 (0.1) <sup>b</sup>  | 0.41(0.0)        | 0.40 (0.1)               | 0.41 (0.0)       | 0.40 (0.0)               | 0.41 (0.0)       |
| Z-Score for BMI                                                                         | -1.00 (1.6)              | -0.93 (1.2)       | -1.21 (1.5) <sup>b</sup> | -0.71 (1.2)      | -1.10 (1.5) <sup>b</sup> | -0.79 (1.1)      | -1.05 (1.3) <sup>b</sup> | -0.73 (1.2)      |
| Z-Score for height                                                                      | -0.92 (1.0)              | -1.07 (0.8)       | -0.94 (1.0) <sup>b</sup> | -1.07 (0.8)      | -0.99 (1.0)              | -1.08 (0.8)      | -1.17 (0.7)              | -1.29 (0.8)      |
| <b>BMI for age &amp; height for age categories - prevalence estimates (with 95% CI)</b> |                          |                   |                          |                  |                          |                  |                          |                  |

|                               |                   |                     |                     |                    |                     |                     |                    |                     |
|-------------------------------|-------------------|---------------------|---------------------|--------------------|---------------------|---------------------|--------------------|---------------------|
| Severe thinness<br>< -3 SD    | 8.6<br>(5.4–13.5) | 4.4<br>(2.4–8.0)    | 11.8<br>(9.5–14.8)  | 2.7<br>(1.7–4.2)   | 8.1<br>(6.2–10.6)   | 1.6<br>(0.9–3.0)    | 5.6<br>(2.9–10.6)  | 1.3<br>(0.4–4.7)    |
| Thinness<br>-3 SD to <-2 SD   | 21.5<br>(16.2–28) | 14.7<br>(10.6–19.9) | 19.7<br>(16.6–23.1) | 11.0<br>(8.8–13.6) | 20.2<br>(17.2–23.7) | 12.8<br>(10.4–15.7) | 14.0<br>(9.2–20.6) | 15.8<br>(10.8–22.4) |
| Overweight<br>>+1 SD to +2 SD | 9.1<br>(5.8–14.2) | 4.9<br>(2.8–8.5)    | 7.0<br>(5.2–9.4)    | 8.5<br>(6.5–10.9)  | 8.3<br>(6.3–10.8)   | 5.1<br>(3.6–7.1)    | 6.3<br>(3.3–11.5)  | 7.9<br>(4.6–13.3)   |
| Obese<br>> +2 SD              | 3.8<br>(1.8–7.6)  | 2.2<br>(1.0–5.1)    | 3.8<br>(2.5–5.7)    | 1.9<br>(1.0–5.1)   | 2.4<br>(1.4–4.0)    | 1.3<br>(0.7–2.6)    | 2.1<br>(0.7–6.0)   | 1.3<br>(0.4–4.7)    |
| Severe stunting<br><-3SD      | 3.8<br>(1.8–7.6)  | 2.7<br>(1.2–5.7)    | 2.1<br>(1.2–3.6)    | 0.6<br>(0.2–1.6)   | 2.8<br>(1.7–4.4)    | 1.0<br>(0.5–2.1)    | 1.4<br>(0.4–5.0)   | 0.7<br>(0.1–3.6)    |
| Stunting<br>-3 SD to <-2 SD   | 8.1<br>(4.9–12.9) | 9.3<br>(6.2–13.8)   | 13.6<br>(11.0–16.6) | 10.5<br>(8.4–13.1) | 9.7<br>(7.5–12.4)   | 10.9<br>(8.6–13.6)  | 10.5<br>(6.5–16.6) | 15.8<br>(10.8–22.4) |

196 <sup>a</sup> Age group 13 includes 13–13.9 year olds, age group 14 includes 14–14.9 year olds, age group 15 includes 15–15.9 year olds and age group 16

197 includes 16–16.9 year olds

198 <sup>b</sup> Difference between boys and girls is statistically significant at 0.05 level

199 According to WHO growth references, prevalence of age adjusted obesity, overweight,  
 200 thinness, severe thinness, stunting and severe stunting among boys in this study population  
 201 were 3.1% (95% CI; 2.3–4.1%, n = 46), 7.7% (95% CI; 6.4–9.2, n = 114), 19.6% (95% CI;  
 202 17.6 - 21.7, n = 290), 9.4% (95% CI; 8.0–11.0, n = 139), 11.1% (95% CI; 9.6 - 12.8, n =  
 203 164) and 2.5% (95% CI; 1.8–3.4, n = 37) respectively. Among girls, respective values were  
 204 1.7% (95% CI; 1.1–2.4%, n = 27), 6.7% (95% CI; 5.5 - 8.0, n = 108), 12.6% (95% CI; 11.1 -  
 205 14.3, n = 205), 2.4% (95% CI; 1.8–3.3, n = 39), 11.0% (95% CI; 9.5 - 12.6, n = 178) and  
 206 1.0% (95% CI; 0.7–1.7, n = 17). Of the total number of students, 2.4% (95% CI; 1.9–2.9, n =  
 207 73) were obese, 7.1% (95% CI; 6.3–8.1, n = 222) were overweight, 15.9% (95% CI; 14.7–  
 208 17.3, n = 495) were thin, 5.7% (95% CI; 5.0–6.6, n = 178) were severely thin, 11.0% (95%  
 209 CI; 9.9–12.2, n = 342) were stunted and 1.7% (95% CI; 1.3–2.3, n = 54) were severely  
 210 stunted.

## 211 **Distribution of double burden of malnutrition by the socio-** 212 **demographic characteristics**

213 We looked at the distribution of thinness and overweight/obesity by socio-demographic  
 214 characteristics of the study sample to identify the determinants of nutritional issues in this  
 215 study sample (Table 3).

216 **Table 3: Distribution of thinness and overweight/obesity among adolescents in the**  
 217 **Anuradhapura district, Sri Lanka**

| Socio-demographic characteristics | BMI categories |      |        |      |                  |      | Statistical Significance |       |
|-----------------------------------|----------------|------|--------|------|------------------|------|--------------------------|-------|
|                                   | Thin           |      | Normal |      | Overweight/obese |      |                          |       |
|                                   | n              | %    | n      | %    | n                | %    |                          |       |
| <b>Age in years</b>               |                |      |        |      |                  |      |                          |       |
| 13                                | 99             | 24.1 | 272    | 66.2 | 40               | 9.7  | Chi-square               | 7.487 |
| 14                                | 268            | 22.1 | 817    | 67.4 | 128              | 10.6 | p                        | 0.278 |
| 15                                | 252            | 21.2 | 833    | 70.2 | 101              | 8.5  |                          |       |
| 16                                | 54             | 18.3 | 215    | 72.9 | 26               | 8.8  |                          |       |

|                           |     |      |      |      |     |      |            |                    |
|---------------------------|-----|------|------|------|-----|------|------------|--------------------|
| <b>Sex</b>                |     |      |      |      |     |      |            |                    |
| Male                      | 429 | 29.0 | 892  | 60.2 | 160 | 10.8 | Chi-square | 104.92             |
| Female                    | 244 | 15.0 | 1245 | 76.7 | 135 | 8.3  | p          | 0.000 <sup>a</sup> |
| <b>Educational zone</b>   |     |      |      |      |     |      |            |                    |
| Anuradhapura              | 221 | 20.6 | 733  | 68.3 | 119 | 11.1 | Chi-square | 19.763             |
| Kekirawa                  | 135 | 26.7 | 321  | 63.4 | 50  | 9.9  | p          | 0.011 <sup>a</sup> |
| Tambuththegama            | 122 | 18.5 | 480  | 72.7 | 58  | 8.8  |            |                    |
| Galenbindunuwewa          | 89  | 21.9 | 288  | 70.8 | 30  | 7.4  |            |                    |
| Kebithigollewa            | 106 | 23.1 | 315  | 68.6 | 38  | 8.3  |            |                    |
| <b>School type</b>        |     |      |      |      |     |      |            |                    |
| 1AB                       | 221 | 19.2 | 785  | 68.0 | 148 | 12.8 | Chi-square | 28.846             |
| 1C                        | 288 | 23.7 | 829  | 68.2 | 98  | 8.1  | p          | 0.000 <sup>a</sup> |
| Type 2                    | 164 | 22.3 | 523  | 71.1 | 49  | 6.7  |            |                    |
| <b>Maternal Education</b> |     |      |      |      |     |      |            |                    |
| Up to grade 11            | 346 | 21.6 | 1122 | 70.0 | 134 | 8.4  | Chi-square | 13.548             |
| O/L and above             | 173 | 20.9 | 545  | 66.0 | 108 | 13.1 | p          | 0.001 <sup>a</sup> |
| <b>Paternal Education</b> |     |      |      |      |     |      |            |                    |
| Up to grade 11            | 331 | 22.7 | 1009 | 69.2 | 119 | 8.2  | Chi-square | 14.068             |
| O/L and above             | 148 | 19.5 | 513  | 67.6 | 98  | 12.9 | p          | 0.001 <sup>a</sup> |
| <b>Mother employed</b>    |     |      |      |      |     |      |            |                    |
| Yes                       | 233 | 21.5 | 736  | 67.8 | 116 | 10.7 | Chi-square | 2.51               |
| No                        | 434 | 21.8 | 1380 | 69.3 | 178 | 8.9  | p          | 0.285              |
| <b>Father employed</b>    |     |      |      |      |     |      |            |                    |
| Yes                       | 602 | 21.4 | 1935 | 68.8 | 277 | 9.8  | Chi-square | 6.013              |
| No                        | 61  | 27.7 | 144  | 65.5 | 15  | 6.8  | p          | 0.049              |
| <b>Social class</b>       |     |      |      |      |     |      |            |                    |
| High                      | 37  | 18.7 | 129  | 65.2 | 32  | 16.2 | Chi-square | 14.874             |
| Middle                    | 525 | 21.6 | 1682 | 69.4 | 218 | 9.0  | p          | 0.005 <sup>a</sup> |
| Low                       | 73  | 24.6 | 204  | 68.7 | 20  | 6.7  |            |                    |

218 <sup>a</sup> The Chi-square statistic is significant at the 0.05 level.

219 There was high prevalence of thinness in Kekirawa compared to other areas, while the  
220 overweight/ obesity was highest among urban areas (Anuradhapura). A significantly higher  
221 percentage of adolescents in type 1AB schools (larger and usually located in urban/semi  
222 urban settings) had overweight and obesity (12.8% compared to 8.1% and 6.7% in type 1C  
223 and type 2 schools). Students from families with higher parental education level, were

224 significantly more overweight/ obese. The highest prevalence of overweight/ obesity was  
 225 reported among adolescents from high social class (16.2%).

226 **Comparison of prevalence of obesity derived from different**  
 227 **definitions**

228 To describe the variation of estimates using different definitions, we used WHO growth  
 229 references, IOTF (international and Asian) and Indian thresholds for BMI in this study  
 230 sample (Table 4).

231 **Table 4: Prevalence of overweight and obesity among 3105 adolescents from rural Sri**  
 232 **Lanka by different definitions**

| Age <sup>a</sup><br>(Years) | Prevalence of overweight (95 confidence interval) by the definition used |                          |                            |                            | Prevalence of obesity (95 confidence interval) by the definition used |                          |                          |                          |
|-----------------------------|--------------------------------------------------------------------------|--------------------------|----------------------------|----------------------------|-----------------------------------------------------------------------|--------------------------|--------------------------|--------------------------|
|                             | WHO                                                                      | IOTF International       | IOTF Asian                 | Indian                     | WHO                                                                   | IOTF International       | IOTF Asian               | Indian                   |
| <b>Boys</b>                 |                                                                          |                          |                            |                            |                                                                       |                          |                          |                          |
| 13                          | 9.1<br>(5.8-14.2)                                                        | 8.1<br>(4.6-13.0)        | 11.3<br>(7.1-16.7)         | 10.8<br>(6.7-16.1)         | 3.8<br>(1.8-7.6)                                                      | 2.2<br>(0.8-5.4)         | 5.4<br>(3.0-9.6)         | 6.5<br>(3.7-10.9)        |
| 14                          | 7.0<br>(5.2 - 9.4)                                                       | 6.3<br>(4.4-8.5)         | 7.6<br>(5.6-10.1)          | 6.8<br>(4.9-9.1)           | 3.8<br>(2.5-5.7)                                                      | 2.3<br>(1.3-3.8)         | 5.7<br>(4.1-8.0)         | 7.0<br>(5.2-9.4)         |
| 15                          | 8.3<br>(6.3-10.8)                                                        | 7.1<br>(5.1-9.5)         | 8.8<br>(6.6-11.4)          | 7.3<br>(5.3-9.7)           | 2.4<br>(1.4-4.0)                                                      | 1.9<br>(1.0-3.5)         | 4.7<br>(3.2-6.8)         | 6.2<br>(4.5-8.5)         |
| 16                          | 6.3<br>(3.3-11.5)                                                        | 5.6<br>(2.4-10.7)        | 9.8<br>(5.5-15.9)          | 9.8<br>(5.5-15.9)          | 2.1<br>(0.7-6.0)                                                      | 2.1<br>(0.7-6.0)         | 2.1<br>(0.7-6.0)         | 2.1<br>(0.7-6.0)         |
| <b>Total</b>                | <b>7.7<br/>(6.4 - 9.2)</b>                                               | <b>6.8<br/>(5.5-8.2)</b> | <b>8.8<br/>(7.4-10.3)</b>  | <b>7.8<br/>(6.5-9.2)</b>   | <b>3.1<br/>(2.3-4.1)</b>                                              | <b>2.1<br/>(1.5-3.0)</b> | <b>4.9<br/>(3.9-6.2)</b> | <b>6.2<br/>(5.0-7.5)</b> |
| <b>Girls</b>                |                                                                          |                          |                            |                            |                                                                       |                          |                          |                          |
| 13                          | 4.9<br>(2.8 - 8.5)                                                       | 4.4<br>(2.2-8.0)         | 9.8<br>(6.2-14.4)          | 7.6<br>(4.5-11.8)          | 2.2<br>(1.0-5.1)                                                      | 0.9<br>(0.2-3.2)         | 4.0<br>(2.1-7.4)         | 3.1<br>(1.5-6.3)         |
| 14                          | 8.5<br>(6.5-10.9)                                                        | 7.5<br>(5.6-9.8)         | 12.4<br>(9.9-15.2)         | 11.7<br>(9.3-14.5)         | 1.9<br>(1.1-3.3)                                                      | 1.4<br>(0.7-2.7)         | 4.1<br>(2.8-6.0)         | 3.4<br>(2.3-5.2)         |
| 15                          | 5.1<br>(3.6 - 7.1)                                                       | 4.9<br>(3.3-7.0)         | 10.3<br>(8.0-13.0)         | 8.7<br>(6.6-11.2)          | 1.3<br>(0.7-2.6)                                                      | 1.3<br>(0.7-2.6)         | 3.3<br>(2.1-5.0)         | 3.1<br>(2.0-4.5)         |
| 16                          | 7.9<br>(4.6-13.3)                                                        | 7.9<br>(4.1-13.4)        | 13.8<br>(8.8-20.3)         | 11.2<br>(6.7-17.3)         | 1.3<br>(0.4-4.7)                                                      | 0.7<br>(0.1-3.6)         | 2.6<br>(1.0-6.6)         | 2.6<br>(1.0-6.6)         |
| <b>Total</b>                | <b>6.7<br/>(5.5 - 8.0)</b>                                               | <b>6.2<br/>(5.0-7.4)</b> | <b>11.4<br/>(9.9-13.0)</b> | <b>10.0<br/>(8.6-11.5)</b> | <b>1.7<br/>(1.1-2.4)</b>                                              | <b>1.2<br/>(0.8-1.9)</b> | <b>3.6<br/>(2.8-4.6)</b> | <b>3.2<br/>(2.4-4.2)</b> |

233 <sup>a</sup>Age group 13 includes 13–13.9-year-olds, age group 14 includes 14–14.9-year-olds, age  
234 group 15 includes 15–15.9-year-olds and age group 16 includes 16–16.9-year-olds

235  
236 The lowest prevalence for overweight and obesity was seen with IOTF-international  
237 thresholds. Especially in girls, IOTF-Asian and Indian thresholds produced higher  
238 prevalence of overweight and obesity than WHO and IOTF-international thresholds.  
239 McNemar’s test revealed that the prevalence estimates of boys and girls using all 5  
240 definitions were significantly different from each other ( $p < 0.01$ ) with the exception of  
241 difference between Indian threshold and IOTF-Asian threshold in boys ( $p = 0.5$ ).

## 242 **Waist circumference as a marker of obesity**

243 Since this was a large-scale study, WC measurement without clothes was not feasible.  
244 Instead, we calculated a correction factor for school uniform in a subsample. Paired sample  
245 t-test revealed a significant difference between the waist circumference measurements with  
246 and without uniforms in both sexes; mean difference (CI) = 1.04 (0.87 – 1.21),  $p = 0.000$  for  
247 boys and 1.61 (1.33 – 1.88),  $p = 0.000$  for girls. Therefore, a correction of 1.04 cm and 1.61  
248 cm was applied to the waist circumference measurements of boys and girls respectively, to  
249 get actual waist circumference (without school uniform). BMI had a strong positive  
250 correlation with both WC and WHtR in both sexes;  $r = 0.944$  and  $0.898$  for boys and  $0.900$   
251 and  $0.894$  for girls respectively.

252 To describe the variation of estimates of central obesity using different definitions, we used  
253 Indian, South Indian, British WC thresholds and WHtR in this study sample (Table 5).  
254 Prevalence estimates of central obesity were significantly different between each of the four  
255 definitions (McNemar’s test;  $p < 0.001$ ).

256 **Table 5: Prevalence of central obesity among 3105 adolescents from rural Sri Lanka by**  
257 **different threshold values**

| Age <sup>a</sup><br>(years) | N           | The definition used <sup>b</sup> |                       |                        |                       |
|-----------------------------|-------------|----------------------------------|-----------------------|------------------------|-----------------------|
|                             |             | WC-Indian                        | WC-South Indian       | WC-British             | Waist to height ratio |
| <b>Boys</b>                 |             |                                  |                       |                        |                       |
| 13                          | 186         | 5.9 (3.3-0.3)                    | 11.8 (8.0-17.3)       | 12.4 (8.4-17.9)        | 8.6 (5.4-13.5)        |
| 14                          | 574         | 6.3 (4.6-8.6)                    | 9.2 (7.1-11.9)        | 9.0 (6.7-11.3)         | 6.8 (5.0-9.2)         |
| 15                          | 578         | 5.7 (4.1-7.9)                    | 9.5 (7.4-12.2)        | 9.0 (7.0-11.6)         | 8.0 (6.0-10.4)        |
| 16                          | 143         | 4.2 (1.9-8.9)                    | 8.4 (4.9-14.1)        | 6.3 (3.3-11.5)         | 6.3 (3.3-11.5)        |
| <b>Total</b>                | <b>1481</b> | <b>5.8 (4.7-7.1)</b>             | <b>9.6 (8.2-11.2)</b> | <b>9.2 (7.7-10.6)</b>  | <b>7.4 (6.2-8.9)</b>  |
| <b>Girls</b>                |             |                                  |                       |                        |                       |
| 13                          | 225         | 2.7 (1.2-5.7)                    | 6.2 (3.7-10.2)        | 8.9 (5.8-13.3)         | 4.9 (2.8-8.5)         |
| 14                          | 639         | 3.0 (1.9-4.6)                    | 5.9 (4.4-8.1)         | 12.4 (10.0-15.1)       | 5.6 (4.1-7.7)         |
| 15                          | 609         | 2.5 (1.5-4.0)                    | 4.1 (2.8-6.0)         | 11.3 (9.0-14.1)        | 4.6 (3.2-6.6)         |
| 16                          | 152         | 2.6 (1.0-6.6)                    | 2.6 (1.0-6.6)         | 11.2 (7.1-17.2)        | 7.9 (4.6-13.3)        |
| <b>Total</b>                | <b>1625</b> | <b>2.6 (2.0-3.6)</b>             | <b>5.0 (4.0-6.2)</b>  | <b>11.4 (9.9-13.0)</b> | <b>5.3 (4.4-6.6)</b>  |

258 <sup>a</sup> Age group 13 includes 13–13.9 year olds, 14 includes 14–14.9 year olds, 15 includes 15–  
 259 15.9 year olds and 16 includes 16–16.9 year olds

260 <sup>b</sup> Suggested thresholds: Indian- 70<sup>th</sup> percentile, South Indian- 75<sup>th</sup> percentile, British- 90<sup>th</sup>  
 261 percentile, waist to height ratio- >0.5

## 262 Discussion

263 This study is the largest study reported in the literature on double burden of malnutrition  
 264 among rural adolescents in Sri Lanka. In this study, we showed that the double burden of  
 265 malnutrition among adolescent school children in rural Sri Lanka is a priority public health  
 266 issue with 9.5% prevalence of overweight/obesity and 21.7% prevalence of thinness. In  
 267 addition, 12.8% of children were stunted, showing that the nutrition problem is chronic. We  
 268 further showed the need for consensus on prevalence estimates, which could widely vary  
 269 when using different thresholds.

270 Within country comparison of obesity data alone, our prevalence estimates seemed lower. In  
 271 Colombo, the capital of Sri Lanka, prevalence of obesity was reported as 5.8% among boys  
 272 and 8.6% among girls using the similar WHO thresholds [25]. Even in a 2004 study done in  
 273 Colombo among 8-12 years old, 4.3% boys and 3.1% girls were reported to be obese.

274 However, the latter study was using IOTF-international thresholds [11]. Our comparable  
275 figures using the same thresholds were still lower (Table 4). In a recent study among  
276 preadolescents (5-11 years) in the North Central province, where the Anuradhapura district is  
277 located, the prevalence of obesity using similar WHO thresholds was reported as 2.5% [26].  
278 Although, the prevalence of overweight was lower in our study compared to a 2004 study in  
279 urban Colombo [11], it was higher than prevalence reported from other parts of the country,  
280 including an all island study. In the urban Colombo study, prevalence of overweight was  
281 11.1% in boys and 10.8% in girls using the IOTF thresholds (international) [11]. Using  
282 WHO thresholds, a 1997 study in Colombo (10) gave a prevalence of overweight as 4.0%  
283 and a 2008 study in Kaluthara (a district in urban western province) gave prevalence of  
284 overweight as 4.4% among boys and 8.7% among girls [9]. Prevalence of overweight was  
285 1.7% among boys and 2.7% in girls in an all island study in 2006 when using IOTF  
286 international threshold [27]. The recent study carried out in Anuradhapura district gave quite  
287 lower prevalence of overweight (3.0%). However, the study was done among under-  
288 privilege schools excluding many semi-urban schools in the district that may have given this  
289 low prevalence. They also have selected preadolescent children and have shown that  
290 prevalence of overweight increased with age [26].  
291 Reported prevalence of obesity lies around 1-2% in South Asian countries including India,  
292 while prevalence of thinness is around 22.7-30.7% in India [2]. Hence, our comparative data  
293 (with international thresholds) for obesity and thinness lie within the reported South Asian  
294 prevalence estimates. Increased prevalence of overweight in this rural district may be a  
295 harbinger for complex social, cultural and economic factors that drive change in food habits  
296 and physical activity. Most importantly, well documented social disparities are clearly  
297 playing a significant role in malnutrition in this rural community. Children of educated, high  
298 social class families were having a higher prevalence of overweight and obesity. Low social

299 class also clearly showed higher rates of prevalence of under nutrition. A similar pattern has  
300 been reported in previous studies in Sri Lanka where higher prevalence of overweight and  
301 obesity has increased with family income and thinness being high among low socioeconomic  
302 group [28,29]. Rising prevalence of overweight in this rural community may herald an  
303 epidemic of obesity. There is no reason to say that this is not the situation in many rural  
304 settings in Sri Lanka, except few places, where the under-nutrition is still the priority. The  
305 behavioral as well as policy interventions to control overweight and obesity at population  
306 level usually take years to see an impact. It is of utmost importance to include policy  
307 interventions which could guide behavioral changes to halt the increasing trend of overweight  
308 and obesity in these communities.

309 While the new threats due to overweight and obesity are emerging, the known issues of  
310 under-nutrition are yet to be addressed in rural Sri Lanka. The reason for boys to become  
311 more thin, fat and short than girls needs further exploration. Higher prevalence of  
312 malnourishment among boys is a finding which agrees with many studies done in Sri Lankan  
313 as well as other Asian populations [9,11,30,31]. Increasing prevalence of overweight and  
314 obesity coexisting with under nutrition (thinness and stunting) had been reported in Asian  
315 countries, in low income groups and nutrition deficit regions [32]. The underlying behavioral  
316 or socio-cultural practices for this issue as well as high and gradually increasing prevalence  
317 of under-nutrition from under five children to adolescents need to be investigated with a fresh  
318 approach, because the strategies we have been using over last few decades seems not  
319 working.

320 In this study, we clearly showed that scientific approaches are needed for developing country  
321 specific threshold values to determine obesity, especially as determinants of future adverse  
322 health outcomes.

## 323 **Conclusions**

324 High incidence of overweight in a rural district shown by our study warrants revision of  
325 school health program to address the emerging issue of obesity as well as to include new  
326 approaches to combat age old challenge of malnutrition. Prospective studies as well as  
327 consensus is required to as what standards are to be used in Sri Lanka for clinical practice and  
328 public health interventions. This may be true for many countries in South Asia as well as  
329 other parts in the world, where the genetic risks are different.

330

331

332

333

334

335

336

337

338

339

340

341

342

343

344

345

346

347

348

## 349 **Acknowledgements**

350 We would like to thank K. Bopeththa, J. Chandima, temporary assistant lecturers affiliated to  
351 faculty of Medicine and Allied Sciences, Rajarata University of Sri Lanka, SMAGB  
352 Senevirathna and GLL Indrani for their participation in data collection and data entering  
353 processes.

## 354 **References**

- 355 1. Abarca-Gómez L, Abdeen ZA, Hamid ZA, Abu-Rmeileh N, Acosta-Cazares B, Acuin  
356 C, et al. Worldwide trends in body-mass index, underweight, overweight, and obesity  
357 from 1975 to 2016: a pooled analysis of 2416 population-based measurement studies  
358 in 128·9 million children, adolescents, and adults. *Lancet*. 2017;390(10113):2627–  
359 2642.
- 360 2. Ng M, Fleming T, Robinson M, Thomson B, Graetz N, Margono C. Global, regional,  
361 and national prevalence of overweight and obesity in children and adults during 1980–  
362 2013: a systematic analysis for the Global Burden of Disease Study 2013. *Lancet*.  
363 2014;384(9945):766–781.
- 364 3. GBD 2013 Mortality and Causes of Death Collaborators. Global, regional, and  
365 national age-sex specific all-cause and cause-specific mortality for 240 causes of  
366 death, 1990-2013: A systematic analysis for the Global Burden of Disease Study 2013.  
367 *Lancet*. 2015 Jan;385(9963):117–171.
- 368 4. UNICEF. Progress for Children - A report card on adolescents. April 2012. Available  
369 from: [https://www.unicef.org/media/86401/file/Progress\\_for\\_Children\\_-  
370 \\_No.\\_10\\_EN\\_04272012.pdf](https://www.unicef.org/media/86401/file/Progress_for_Children_-_No._10_EN_04272012.pdf).
- 371 5. Savva SC, Tornaritis M, Savva M, Kourides Y, Panagi A, Silikiotou N, et al. Waist  
372 circumference and waist-to-height ratio are better predictors of cardiovascular disease

- 373 risk factors in children than body mass index. *Int J Obes Relat Metab Disord*.  
374 2000;24(11):1453–1458.
- 375 6. Wickramasinghe VP, Lamabadusuriya SP, Cleghorn GJ, Davies PSW. Validity of  
376 currently used cutoff values of body mass index as a measure of obesity in Sri Lankan  
377 children. *Ceylon Med J*. 2009;54(December):114–119.
- 378 7. Deurenberg P, Deurenberg-Yap M, Guricci S. Asians are different from Caucasians  
379 and from each other in their body mass index/body fat per cent relationship. *Obes Rev*.  
380 2002 Aug;3(3):141–146.
- 381 8. Hettiarachchi M, Liyanage C, Wickremasinghe R, Hilmers D, Abrams S. Nutrient  
382 intake and growth of adolescents in southern Sri Lanka. *Ceylon Med J*. 2006  
383 Sep;51(3):89–92.
- 384 9. Silva S de. The nutritional status of grade eleven students in the medical officer of  
385 health area Kalutara . *J Coll community Physicians Sri Lanka*. 2008;13(2):34–38.
- 386 10. Jayatissa R, Piyasena CL, Warnakulasuriya I, Mahamithawa A. Overweight, thinness  
387 and stunting among adolescent schoolgirls in Sri Lanka: prevalence and associated  
388 factors - Technical report. Jan 1997. Available from:  
389 [https://www.researchgate.net/publication/281119729\\_Overweight\\_thinness\\_and\\_stunting\\_among\\_adolescent\\_schoolgirls\\_in\\_Sri\\_Lanka\\_prevalence\\_and\\_associated\\_factors](https://www.researchgate.net/publication/281119729_Overweight_thinness_and_stunting_among_adolescent_schoolgirls_in_Sri_Lanka_prevalence_and_associated_factors).
- 391 11. Wickramasinghe VP, Lamabadusuriya SP, Atapattu N, Sathyadas G, Kuruparanantha  
392 S. Nutritional status of schoolchildren in an urban area of Sri Lanka. *Ceylon Med J*.  
393 2004;49(December 2004):114–118.
- 394 12. Wickramasinghe VP, Lamabadusuriya SP, Cleghorn GJ, Davies PSW. Defining  
395 anthropometric cut-off levels related to metabolic risk in a group of Sri Lankan  
396 children. *Ann Hum Biol*. 2011 Sep;38(5):537–543.
- 397 13. Statistics Department of Central Bank of Sri Lanka. Economic and social statistics of

- 398 Sri Lanka 2013. Central Bank Printing Press; 2013.
- 399 14. Ministry of education. Sri Lanka Educaion Information 2013. 2013. Available from:  
400 [http://www.moe.gov.lk/english/images/Statistics/sri\\_lanka\\_education\\_information\\_20](http://www.moe.gov.lk/english/images/Statistics/sri_lanka_education_information_20)  
401 13.pdf.
- 402 15. World Health Organization. Section 3 : Guide to Physical Measurements from WHO  
403 STEPS Surveillance. Training. 2008.
- 404 16. World Health Organization. WHO AnthroPlus for personal computers manual:  
405 Software for assessing growth of the world’s children and adolescents. Geneva. WHO.  
406 2009. <http://www.who.int/growthref/tools/en/>.
- 407 17. de Onis M, Onyango AW, Borghi E, Siyam A, Nishida C, Siekmann J. Development  
408 of a WHO growth reference for school-aged children and adolescents. Bull World  
409 Health Organ. 2007;85(9):660–667.
- 410 18. Cole TJ, Lobstein T. Extended international (IOTF) body mass index cut-offs for  
411 thinness, overweight and obesity. *Pediatr Obes*. 2012;7(4):284–294.
- 412 19. Khadilkar V, Khadilkar A. Revised Indian Academy of Pediatrics 2015 growth charts  
413 for height, weight and body mass index for 5-18-year-old Indian children. *Indian J*  
414 *Endocrinol Metab*. 2015;19(4):470-476.
- 415 20. Khadilkar A, Ekbote V, Chiplonkar S, Khadilkar V, Kajale N, Kulkarni S, et al. Waist  
416 circumference percentiles in 2-18 year old indian children. *J Pediatr*. 2014;164(6):  
417 1358-1362.e2.
- 418 21. Patry-Parisien J, Shields M, Bryan S. Comparison of waist circumference using the  
419 world health organization and national institutes of health protocols. *Heal Reports*.  
420 2012;23(3):3–10.
- 421 22. McCarthy HD, Jarrett KV, Crawley HF. The development of waist circumference  
422 percentiles in British children aged 5.0-16.9 y. *Eur J Clin Nutr*. 2001;55(10):902–907.

- 423 23. Zimmet P, Alberti G, Kaufman F, Tajima N, Silink M, Arslanian S, et al. The  
424 metabolic syndrome in children and adolescents—an IDF consensus report. *Diabetes*  
425 *Voice*. 2007;52(4):29–32.
- 426 24. Kuriyan R, Thomas T, Lokesh DP, Sheth N, Mahendra A, Joy R, et al. Waist  
427 circumference and waist for height percentiles in urban South Indian children aged 3-  
428 16 years. *Indian Pediatr*. 2011;48:765–771.
- 429 25. Wickramasinghe VP, Arambepola C, Bandara DMPS, Abeysekera M, Kuruppu S,  
430 Dilshan P, et al. Validity of newly-developed BMI and waist cut-off values for Sri  
431 Lankan children. *Ann Hum Biol*. 2013;40(3):280–285.
- 432 26. Naotunna NPGCR, Dayarathna M, Maheshi H, Amarasinghe GS, Kithmini VS,  
433 Rathnayaka M, et al. Nutritional status among primary school children in rural Sri  
434 Lanka; a public health challenge for a country with high child health standards. *BMC*  
435 *Public Health*. 2017;17(57).
- 436 27. Jayatissa R, Ranbanda RM. Prevalence of challenging nutritional problems among  
437 adolescents in Sri Lanka. *Food Nutr Bull*. 2006;27(2):153–160.
- 438 28. Wickramasinghe VP, Lamabadusuriya SP, Atapattu N, Sathyadas G,  
439 Kuruparananthan PK. Dietary and physical activity patterns of school children in an  
440 urban area of Sri Lanka. *Sri Lanka J Child Heal*. 2005;34:44–49.
- 441 29. Rathnayake KM, Roopasingam T, Wickramasinghe VP. Nutritional and behavioral  
442 determinants of adolescent obesity : a case – control study in Sri Lanka. *BMC Public*  
443 *Health*. 2014; 14:1291-1296.
- 444 30. Kurz KM. Adolescent nutritional status in developing countries. *Proc Nutr Soc*.  
445 2007;55(1B):319–331.
- 446 31. World Health Organization. Regional Office for South-East Asia. (2006). Adolescent  
447 nutrition: a review of the situation in selected South-East Asian Countries. WHO

448           Regional Office for South-East Asia. Available from:  
449           <https://apps.who.int/iris/handle/10665/204764>  
450    32.    Schneider D. International trends in adolescent nutrition. Soc Sci Med.  
451           2000;51(6):955–967.  
452  
453  
454  
455
